# Supplementary material for: Kinetic analysis of Ag particle redispersion into ZSM-5 in the presence of coke using in situ XAFS
Source: Royal Society of Chemistry journal article supplement (doi:10.1039/d0cy01989e), 2020-11-20
Supplement: d0cy01989e1.pdf [file d0cy01989e1.pdf]

## *Supporting information*

# Kinetic Analysis of Ag Particle Redispersion into ZSM-5 in the Presence of Coke Using *In Situ* XAFS

Kazumasa Murata<sup>a</sup>, Junya Ohyama<sup>b, c</sup>, Atsushi Satsuma<sup>\*a, b</sup>

<sup>a</sup>Graduate School of Engineering, Nagoya University, Nagoya 464-8603, Japan

<sup>b</sup>Faculty of Advanced Science and Technology, Kumamoto University, Kumamoto 860-8555, Japan

<sup>c</sup>Elements Strategy Initiative for Catalysts and Batteries (ESICB), Kyoto University, Katsura, Kyoto 615-8520, Japan

Corresponding Author

\*E-mail: [satsuma@chembio.nagoya-u.ac.jp](mailto:satsuma@chembio.nagoya-u.ac.jp).

**Table S1.** Structural properties of the H-ZSM-5 and Ag-ZSM-5 (Ag/Al = 0.37) obtained from N<sub>2</sub> adsorption-desorption isotherms

| Samples     | S <sub>BET</sub> <sup>a</sup> (m <sup>2</sup> g <sup>-1</sup> ) | S <sub>External</sub> <sup>b</sup> (cm <sup>2</sup> g <sup>-1</sup> ) | V <sub>micro</sub> <sup>c</sup> (cm <sup>3</sup> g <sup>-1</sup> ) |
|-------------|-----------------------------------------------------------------|-----------------------------------------------------------------------|--------------------------------------------------------------------|
| H-ZSM-5-AP  | 397                                                             | 2                                                                     | 0.17                                                               |
| Ag-ZSM-5-AP | 352                                                             | 1                                                                     | 0.15                                                               |
| Ag-ZSM-5-AA | 16                                                              | 2                                                                     | 0.01                                                               |
| Ag-ZSM-5-AR | 358                                                             | 1                                                                     | 0.16                                                               |

<sup>a</sup>BET surface area. <sup>b</sup>External surface area determined by t-plot. <sup>c</sup>Micropore volume determined by t-plot.

**Table S2.** Rate constants of the redispersion of Ag particles in Ag-ZSM-5 measured under various conditions

| Experimental conditions |                                  | Rate constant $k_I$<br>( $\times 10^{-2}$ min <sup>-1</sup> ) | $t_{\text{offset}}$<br>(min) |
|-------------------------|----------------------------------|---------------------------------------------------------------|------------------------------|
| Temperature (°C)        | O <sub>2</sub> concentration (%) |                                                               |                              |
| 450                     | 10                               | 0.16±0.00                                                     | 67                           |
| 500                     | 10                               | 0.66±0.00                                                     | 26                           |
| 550                     | 10                               | 1.71±0.02                                                     | 12                           |
| 600                     | 10                               | 6.57±0.09                                                     | 4                            |
| 600                     | 5                                | 2.57±0.03                                                     | 8                            |
| 600                     | 15                               | 12.25±0.23                                                    | 3                            |

**Table S3.** Comparison of rate constant for the redispersion of Ag particles in Ag-ZSM-5 with and without coke

| Ag-ZSM-5 samples              | Rate constant $k_I$<br>( $\times 10^{-2}$ min <sup>-1</sup> ) | $t_{\text{offset}}$<br>(min) |
|-------------------------------|---------------------------------------------------------------|------------------------------|
| Ag-ZSM-5-AA<br>(with coke)    | 6.57±0.09                                                     | 4                            |
| Ag-ZSM-5-AH<br>(without coke) | 6.56±0.32                                                     | 1                            |

**Table S4.** Raman band assignments of coke species<sup>1-3</sup>

| Raman shift (cm <sup>-1</sup> ) | Raman band assignments                                       |
|---------------------------------|--------------------------------------------------------------|
| 1610                            | C=C stretch of monomeric or polycyclic aromatic hydrocarbons |
| 1546                            | C=C stretches of conjugated olefins                          |
| 1462, 1421                      | C=C stretch of cyclopentadienyl species                      |
| 1377                            | C-H bending or aromatic ring breathing vibrations            |
| 1180                            | CH <sub>2</sub> twisting vibrations                          |

**Table S5.** Rate constants of coke combustion in Ag-ZSM-5 measured under various conditions

| Experimental conditions |                                  | Rate constant $k_2$                   | $t_{\text{offset}}$ |
|-------------------------|----------------------------------|---------------------------------------|---------------------|
| Temperature (°C)        | O <sub>2</sub> concentration (%) | ( $\times 10^{-2} \text{ min}^{-1}$ ) | (min)               |
| 400                     | 10                               | 0.03±0.00                             | 60.0                |
| 450                     | 10                               | 0.05±0.00                             | 60.0                |
| 500                     | 10                               | 1.15±0.00                             | 22.6                |
| 550                     | 10                               | 4.74±0.02                             | 5.6                 |
| 600                     | 10                               | 7.81±0.08                             | 5.9                 |
| 600                     | 1                                | 1.28±0.00                             | 17.6                |
| 600                     | 5                                | 2.32±0.02                             | 18.3                |
| 600                     | 15                               | 10.55±0.12                            | 4.9                 |

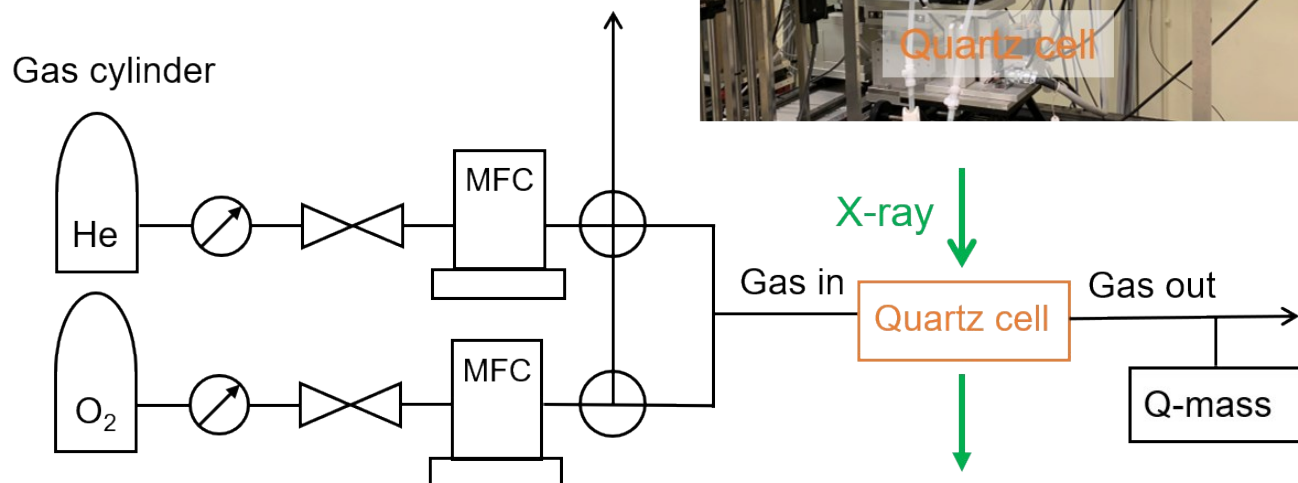

**Figure S1.** Schematic illustration of experimental apparatus for *in situ* XAFS measurements.

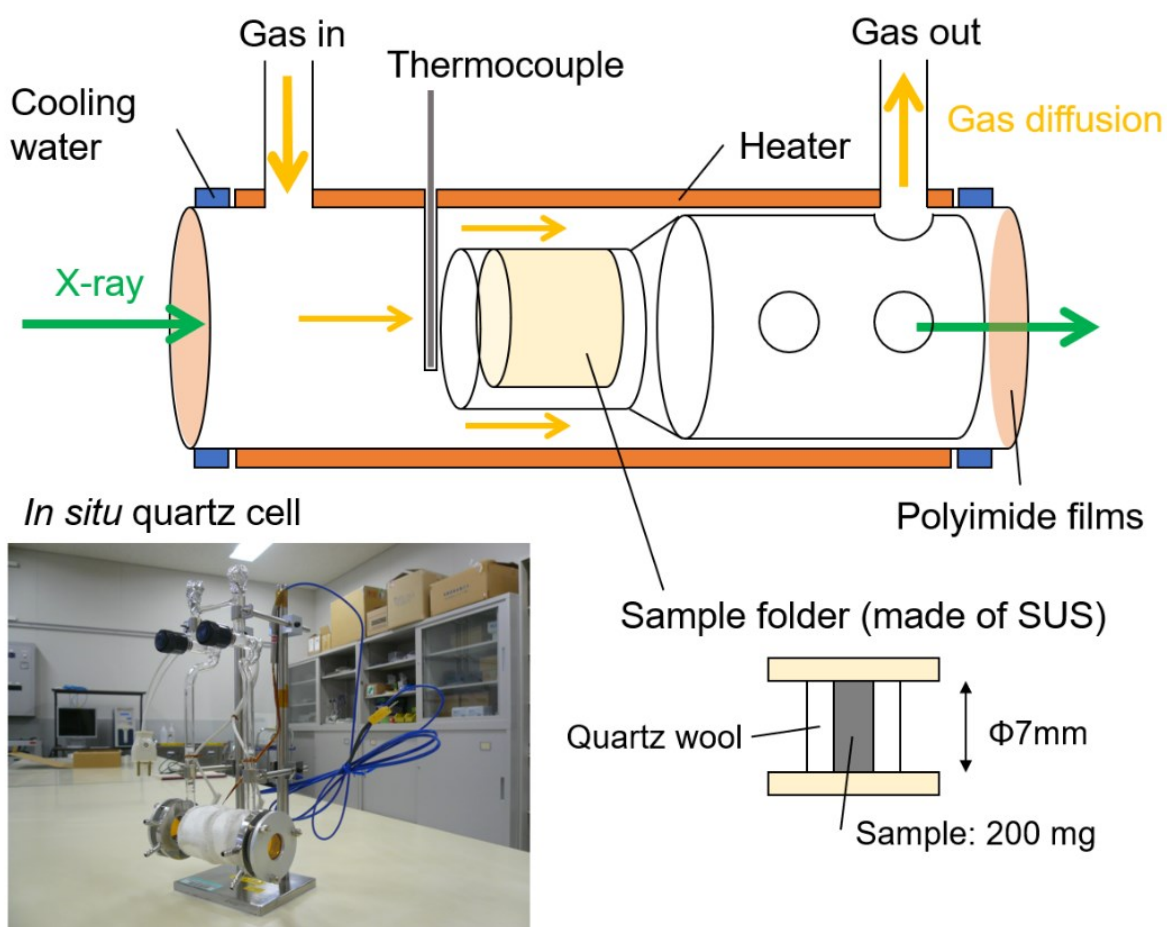

**Figure S2.** Schematic illustration of *in situ* quartz cell.

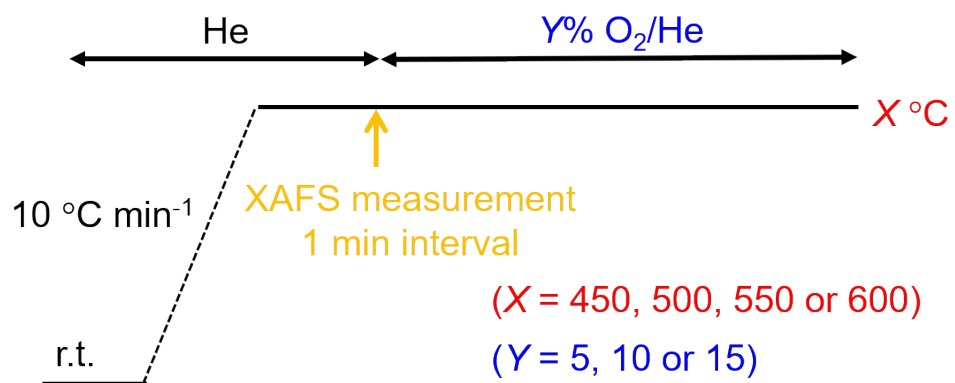

**Figure S3.** Experimental procedure of *in situ* XAFS measurements for the redispersion of Ag particles on Ag-ZSM-5.

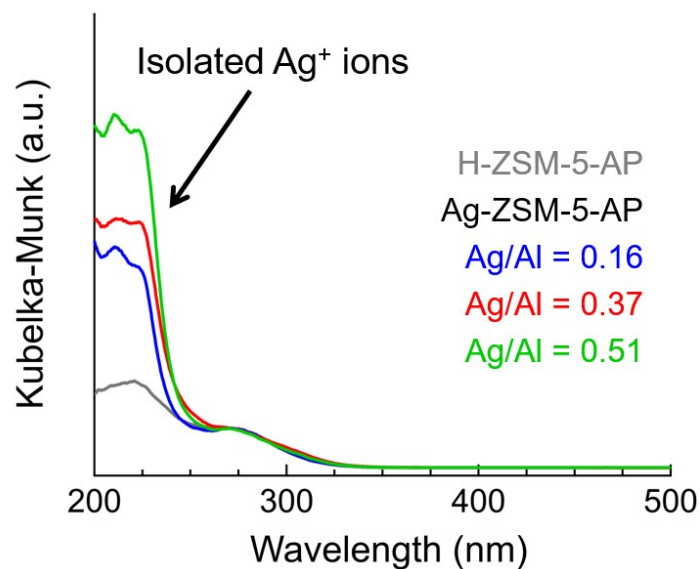

**Figure S4.** UV-vis spectra of H-ZSM-5-AP and Ag-ZSM-5-AP samples with various Ag/Al ratios. UV-vis measurements were performed using a JASCO V-770ICO instrument (JASCO Co.). UV-vis spectra were obtained at room temperature and background spectrum was obtained using Ba(SO<sub>4</sub>) powder. UV-vis bands in range of 200–250, 250–330, and 330–500 nm were assigned to isolated Ag<sup>+</sup> ions, small Ag<sub>n</sub><sup>δ+</sup> ( $n \leq 4$ ) clusters, and larger Ag<sub>n</sub><sup>δ+</sup> ( $n \leq 8$ ) clusters or Ag particles, respectively.<sup>1–</sup>

4

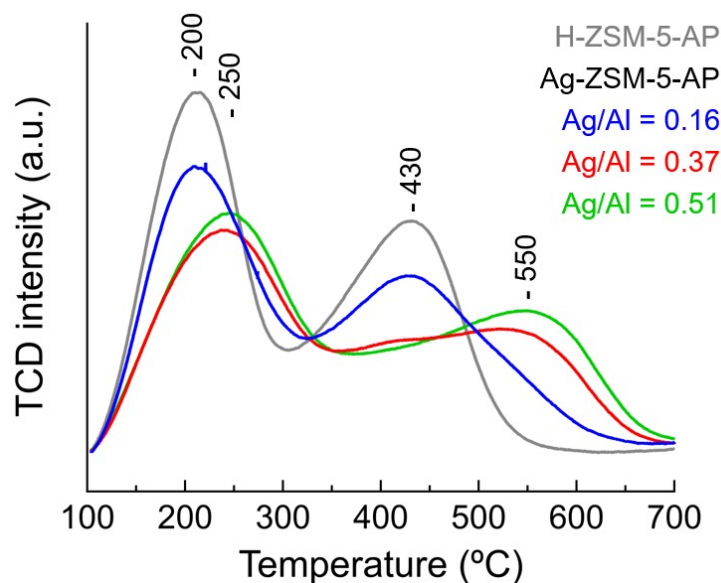

**Figure S5.** NH<sub>3</sub>-TPD profiles of H-ZSM-5-AP and Ag-ZSM-5-AP samples with various Ag/Al ratios.

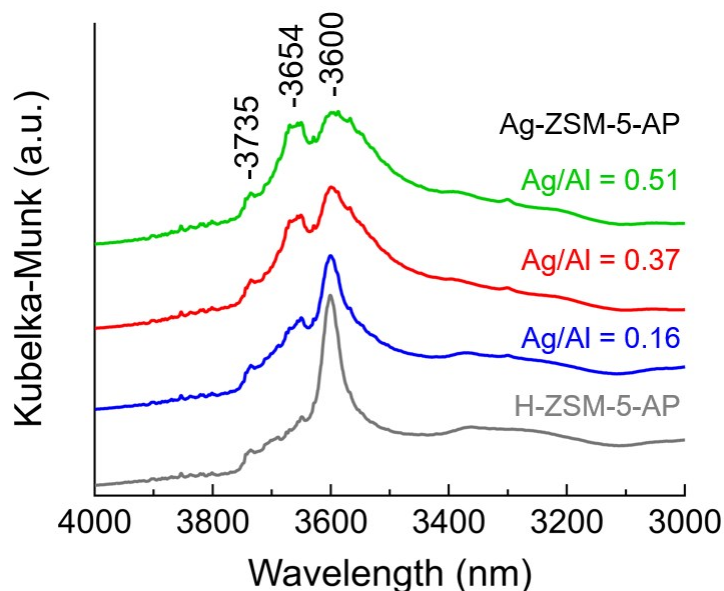

**Figure S6.** IR spectra of H-ZSM-5-AP and Ag-ZSM-5-AP samples with various Ag/Al ratios pretreated under 10% O<sub>2</sub>/Ar at 600 °C. FT-IR measurements were performed using a JASCO FT/IR-6600 instrument (JASCO Co.) with a liquid-nitrogen-cooled HgCdTe (MCT) detector. IR spectra were obtained at 300 °C and background spectrum was obtained using KBr powder.

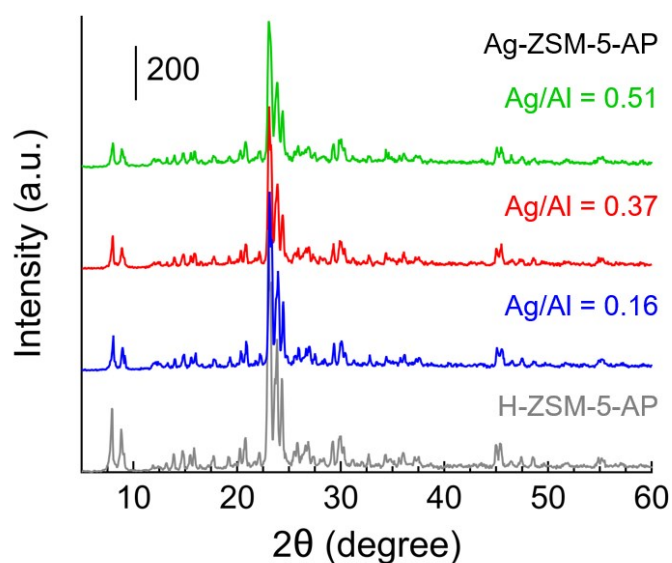

**Figure S7.** XRD patterns of H-ZSM-5-AP and Ag-ZSM-5-AP with various Ag/Al ratios. The diffraction patterns of Ag metal<sup>5,6</sup> at 38.2 and 44.4°, and AgO<sup>7</sup> at 32.6 and 46.2° were not detected.

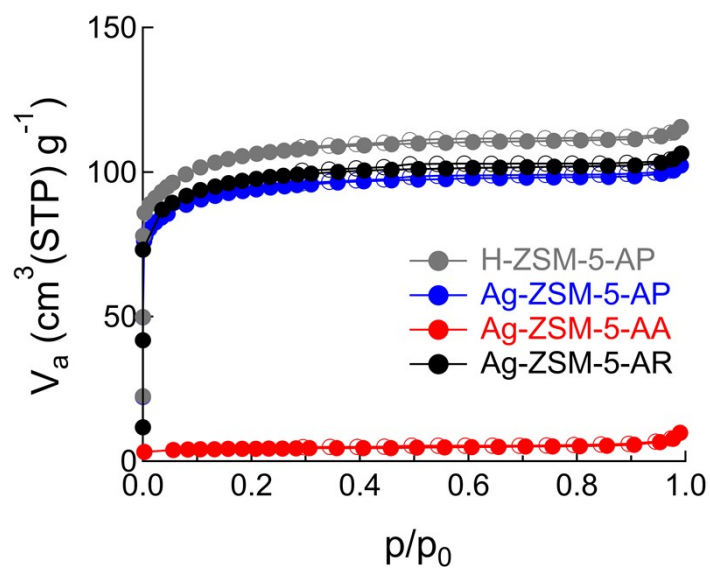

**Figure S8.**  $\text{N}_2$  adsorption–desorption isotherms of H-ZSM-5 and Ag-ZSM-5 ( $\text{Ag/Al} = 0.37$ ) samples.  $\text{N}_2$  adsorption–desorption were conducted on a volumetric adsorption instrument (MicrotracBEL, BELSORPminiII) at liquid nitrogen temperature. The samples were pretreated at 120 °C under vacuum for 1 h.

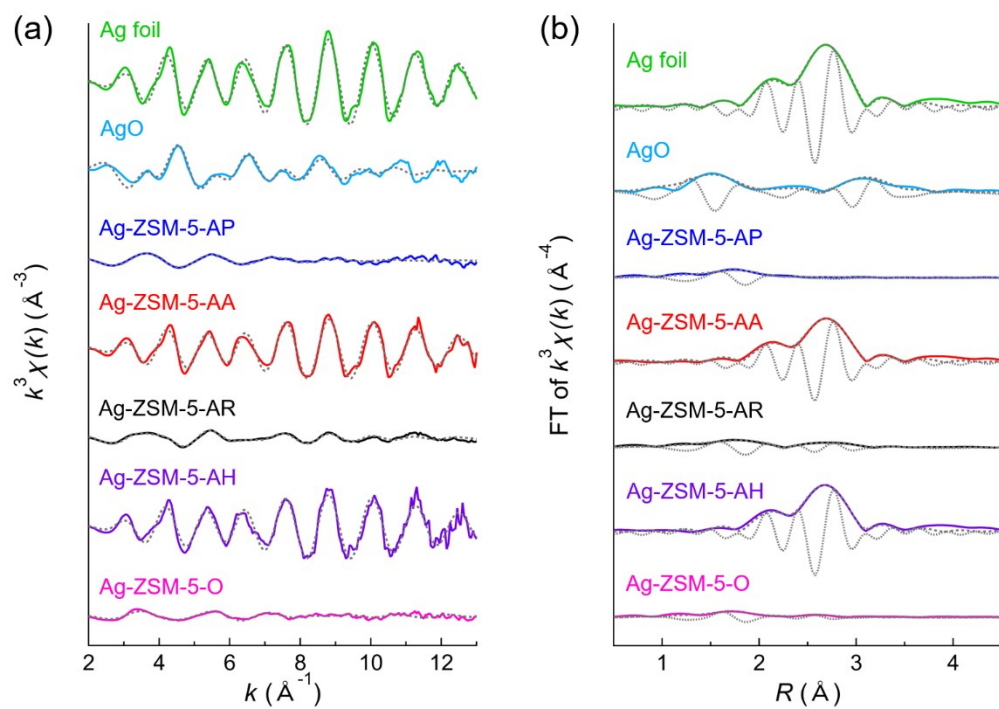

**Figure S9.** Ag K-edge (a)  $k^3$ -weighted EXAFS and (b) FTs of EXAFS spectra for various Ag-ZSM-5 (solid lines: raw data; broken lines: fitting data, dot lines: imaginary component of fitting data).

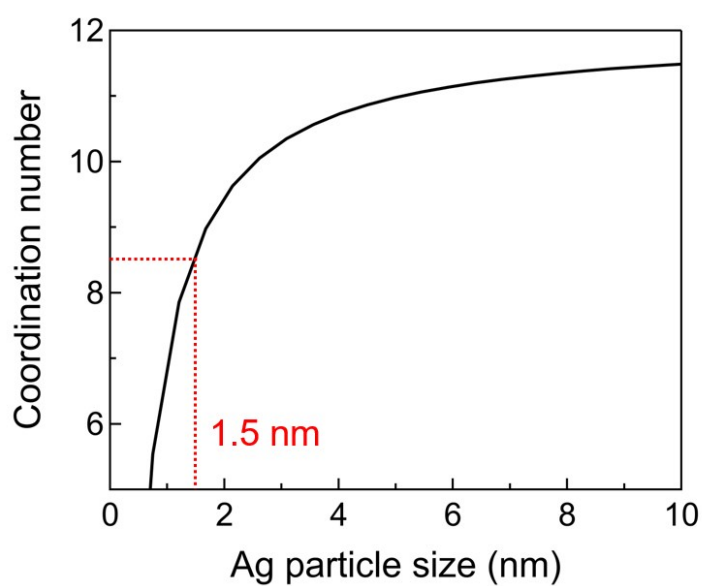

**Figure S10.** Correlation of Ag particle size with average coordination number assuming a fcc cubo-octahedron shape.

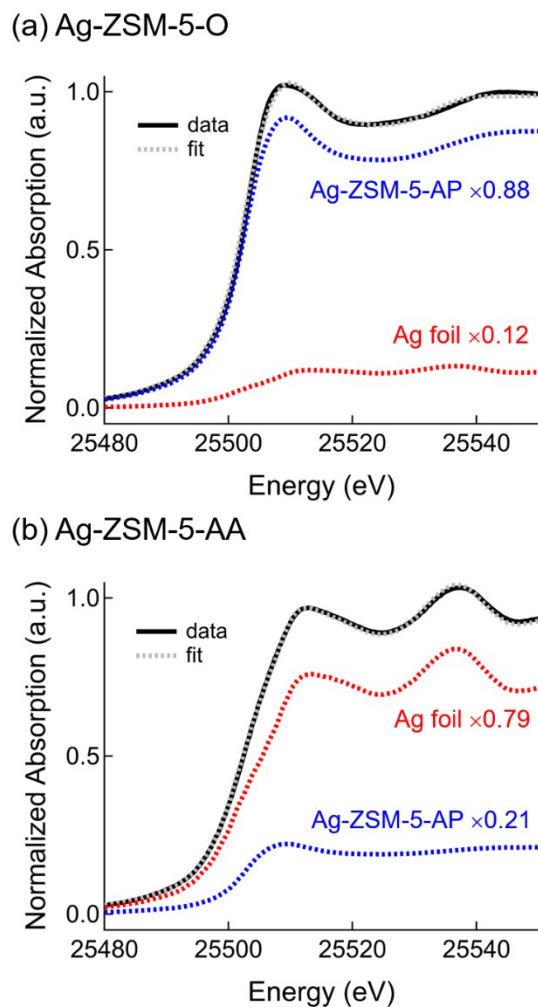

**Figure S11.** LCF results of Ag K-edge XANES spectra, which were measured at room temperature, of (a) Ag-ZSM-5-AP (Ag/Al = 0.37) pretreated under 10% O<sub>2</sub>/He at 600 °C and (b) Ag-ZSM-5-AA (Ag/Al = 0.37) pretreated under He at 600 °C (solid lines: raw data; dot lines: fitting data). Ag foil and Ag-ZSM-5-AP, which were measured at room temperature, were defined as LCF reference of [Ag<sup>0</sup>] = 1 and 0, respectively.

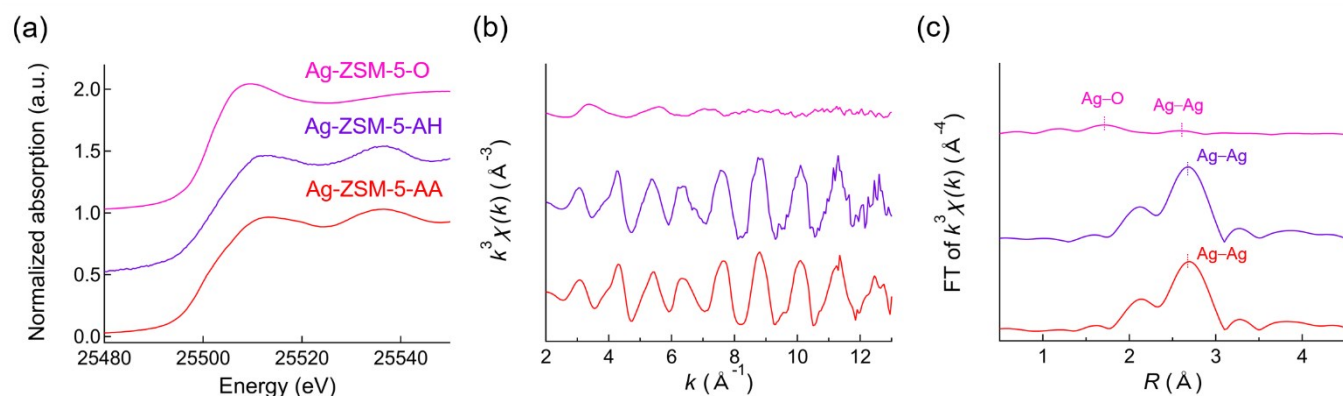

**Figure S12.** Ag K-edge (a) XANES, (b)  $k^3$ -weighted EXAFS, and (c) FT-EXAFS spectra for Ag-ZSM-5-O (pink line), Ag-ZSM-5-AH (purple line), and Ag-ZSM-5-AA (red line) with Ag/Al = 0.37. The FT range in  $k$  space: 3.0–11.0 Å<sup>-1</sup>.

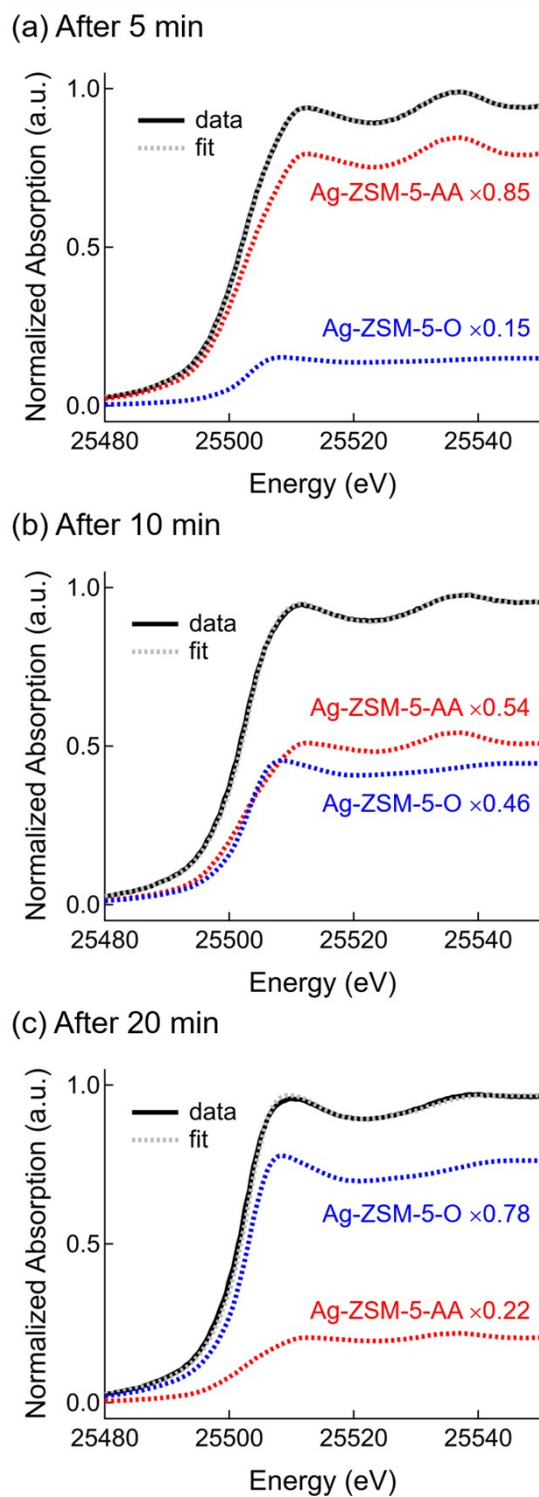

**Figure S13.** LCF results of Ag K-edge XANES spectra of Ag-ZSM-5-AA ( $\text{Ag}/\text{Al} = 0.37$ ) at (a) 5, (b) 10, and (c) 20 min after introducing of a flowing of 10%  $\text{O}_2/\text{He}$  at 600 °C (solid lines: raw data; dot lines: fitting data). Ag-ZSM-5-AA and Ag-ZSM-5-AP, which were measured at 600 °C, were defined as LCF reference of  $[\text{Ag}^0] = 0.79$  and 0.12 ( $[\text{Ag}^+] = 0.21$  and 0.88), respectively.

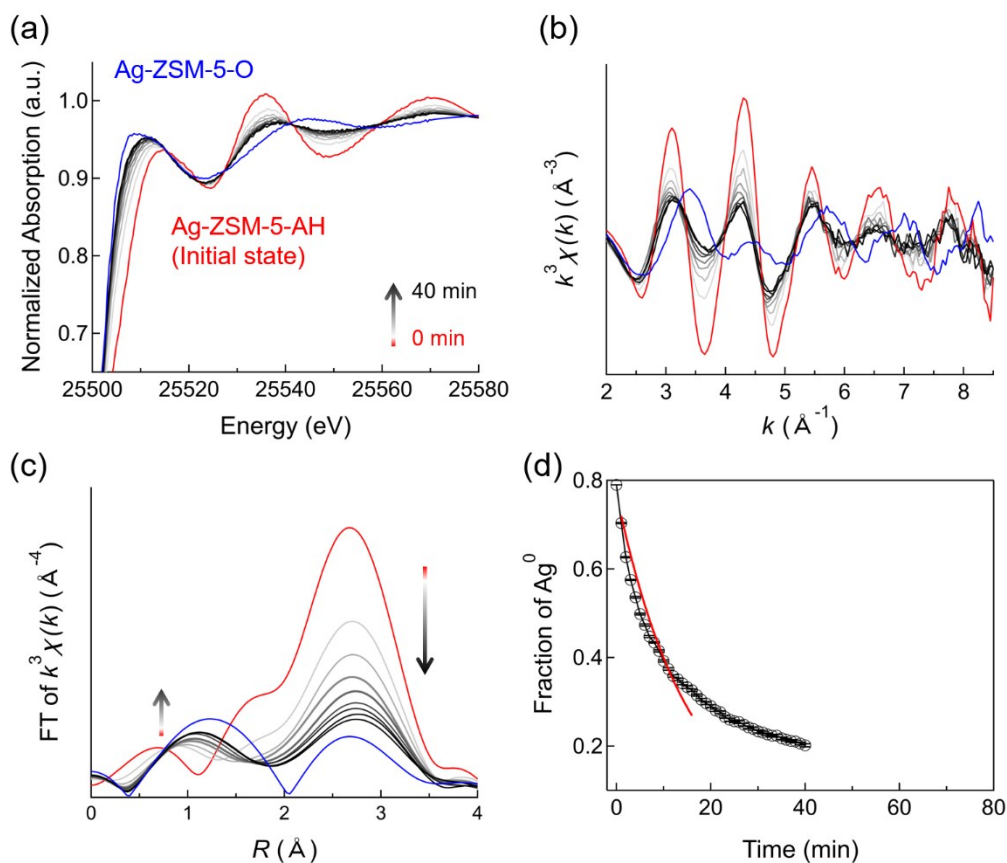

**Figure S14.** Series of Ag K-edge (a) XANES, (b)  $k^3$ -weighted EXAFS, and (c) FT-EXAFS spectra for the Ag-ZSM-5-AH under a flowing of 10% O<sub>2</sub>/He at 600 °C, which were measured for 40 min. (d) Time course of Ag<sup>0</sup> fraction determined by LCF for a series of Ag K-edge XANES spectra. Red line indicates fitting result by pseudo-first-order kinetic model.

(a) 450 °C

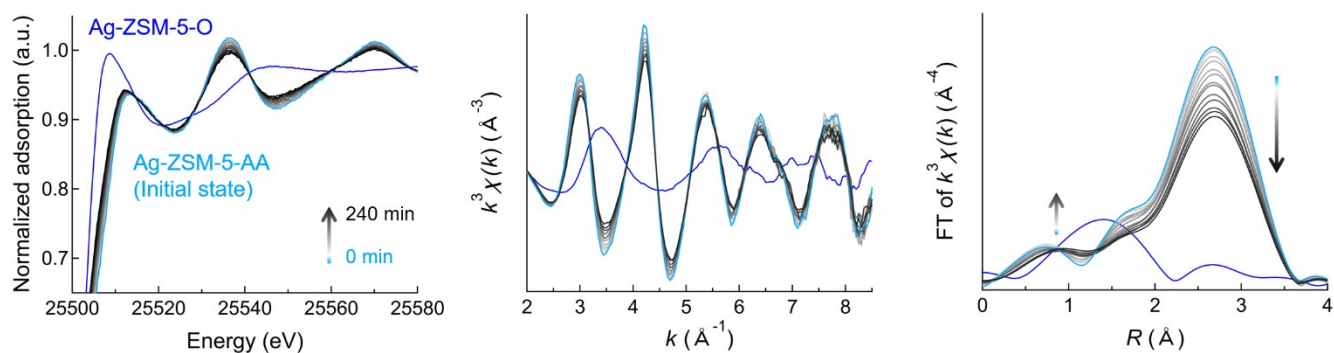

(b) 500 °C

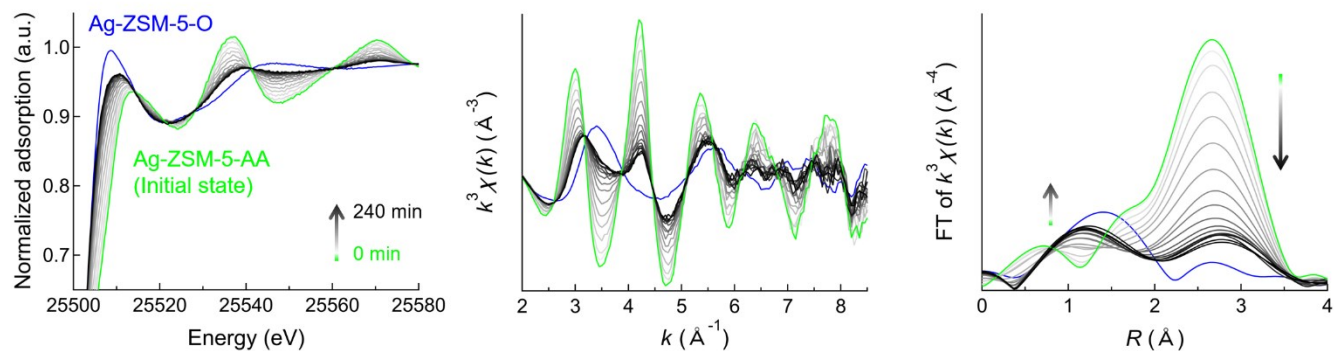

(c) 550 °C

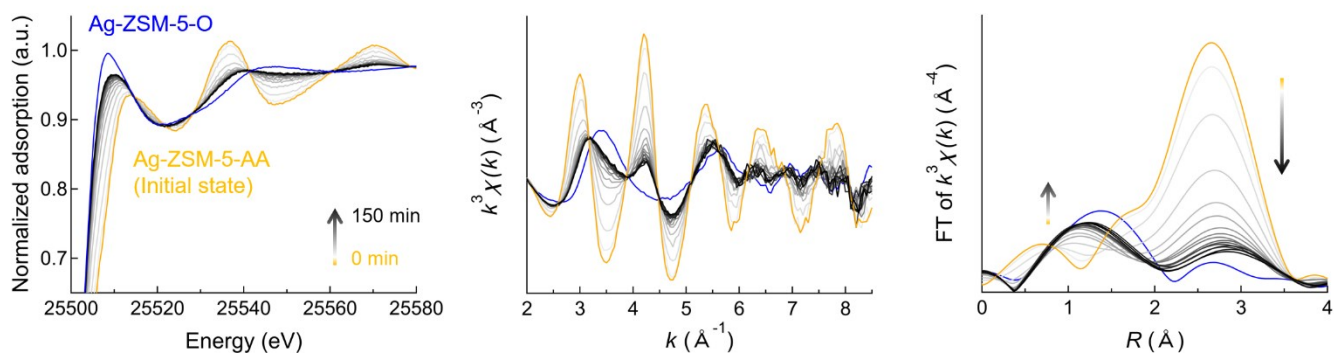

**Figure S15.** Series of Ag K-edge XANES,  $k^3$ -weighted EXAFS, and FT-EXAFS spectra for the Ag-ZSM-5-AA under a flowing of 10% O<sub>2</sub>/He at various temperature ((a) 450 °C (b) 500 °C, and (c) 550 °C), together with XANES and FT-EXAFS spectra of Ag-ZSM-5-AP as references.

(a) 5% O<sub>2</sub>/He

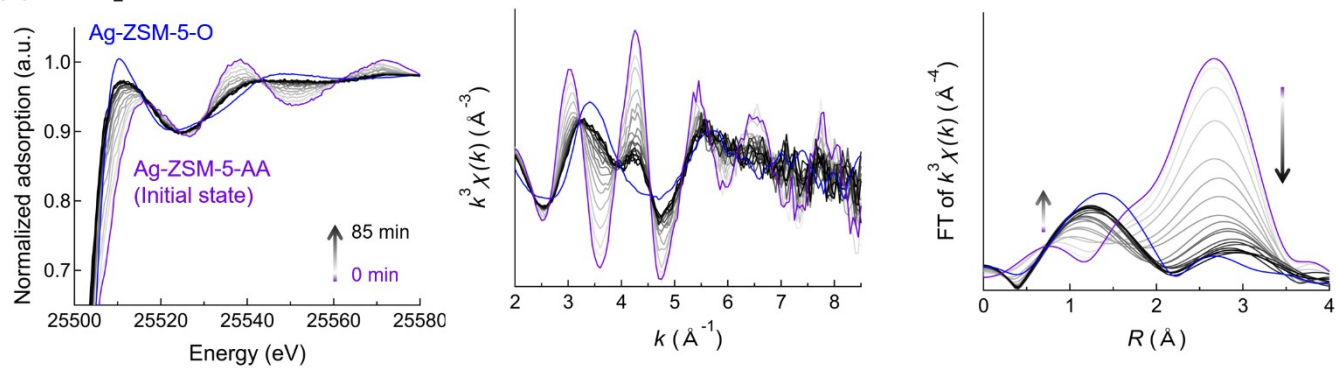

(b) 15% O<sub>2</sub>/He

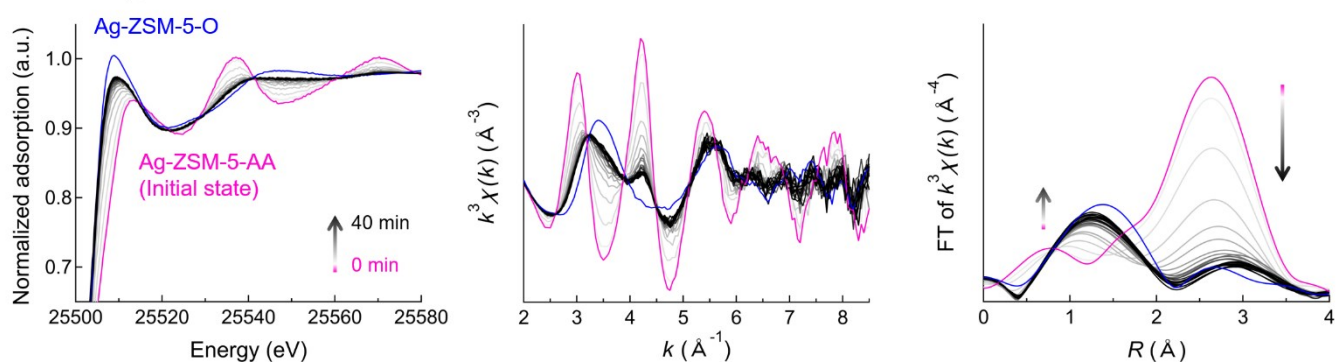

**Figure S16.** Series of Ag K-edge XANES,  $k^3$ -weighted EXAFS and FT-EXAFS spectra for the Ag-ZSM-5-AA under a flowing of (a) 5% and (b) 15% O<sub>2</sub>/He at 600 °C, together with XANES and FT-EXAFS spectra of Ag-ZSM-5-AP as references.

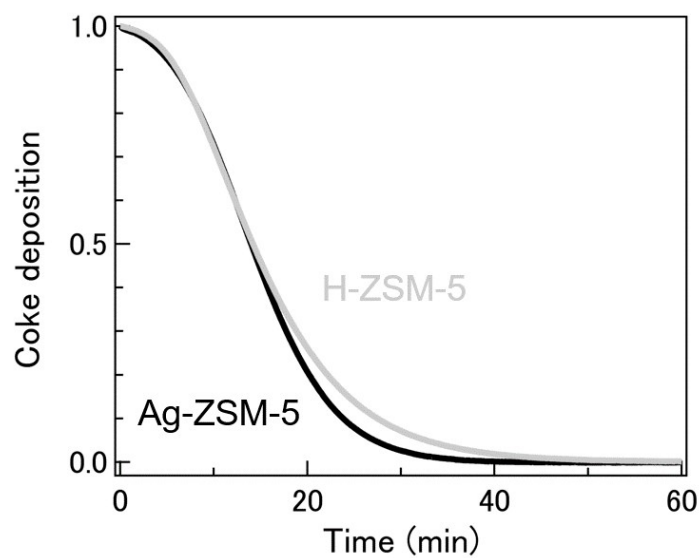

**Figure S17.** Comparison of behaviors of coke combustion in H-ZSM-5-AA and Ag-ZSM-5-AA, which were measured at 600 °C under 10% O<sub>2</sub>/Ar.

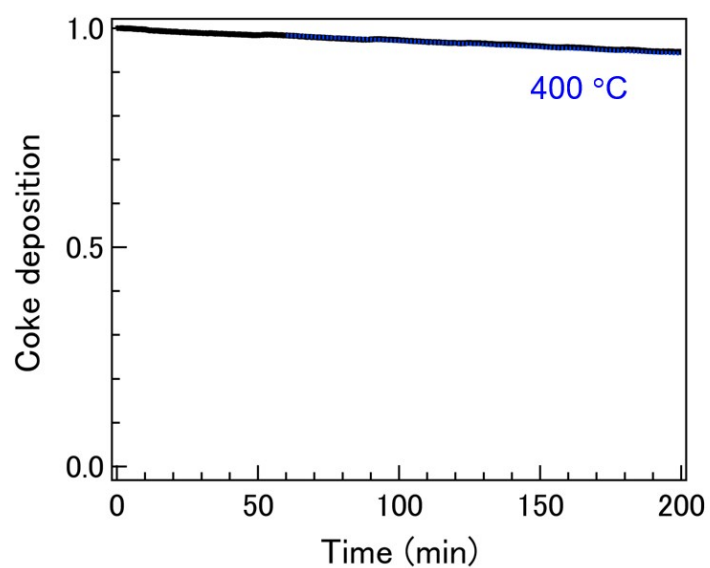

**Figure S18.** Behaviors of coke combustion in the Ag-ZSM-5-AA measured at 400 °C under 10% O<sub>2</sub>/Ar.

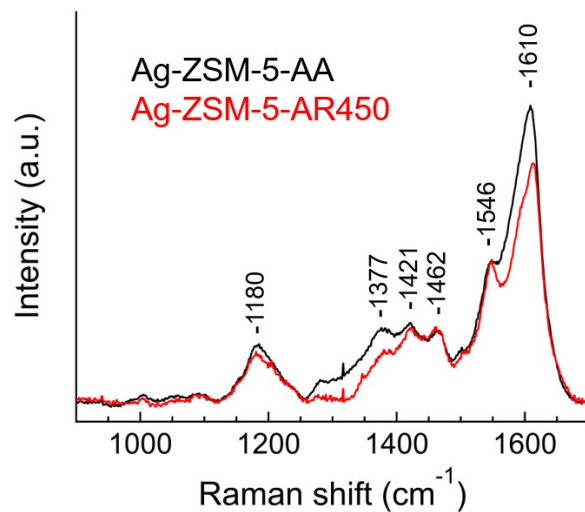

**Figure S19.** Raman spectra of (a) Ag-ZSM-5-AA and (b) Ag-ZSM-5-AR450 (Ag/Al = 0.37) in the region of coke species. The Raman spectra were obtained by a JASCO RMP-330 with a Peltier cooled charge coupled device (CCD) detector using a visible laser ( $\lambda = 532$  nm).

(a) H-ZSM-5-AP

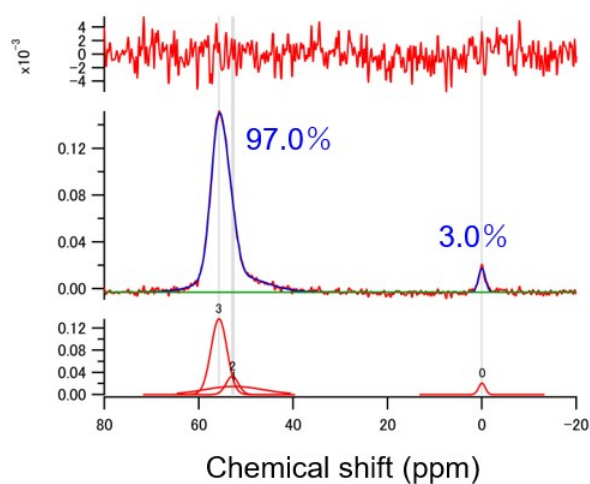

(b) Ag-ZSM-5-AP

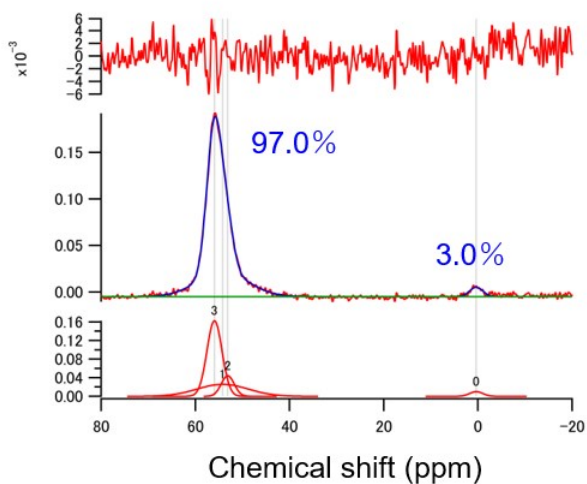

**Figure S20.** (Middle)  $^{27}\text{Al}$  MAS NMR spectra of H-ZSM-5-AP and Ag-ZSM-5-AP ( $\text{Ag}/\text{Al} = 0.37$ ), together with Gaussian fitting results. (Top) fitting error and (bottom) each fitted Gaussian peak. Asymmetric NMR peaks were fitted using two or more Gaussian peaks because  $^{27}\text{Al}$  have quadrupole moment and Al atoms in ZSM-5 were slightly different.

(a) H-ZSM-5-HT

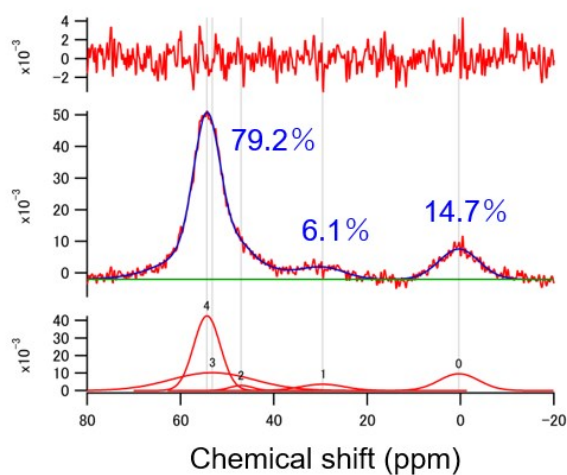

(b) Ag-ZSM-5-HT (Ag/Al=0.16)

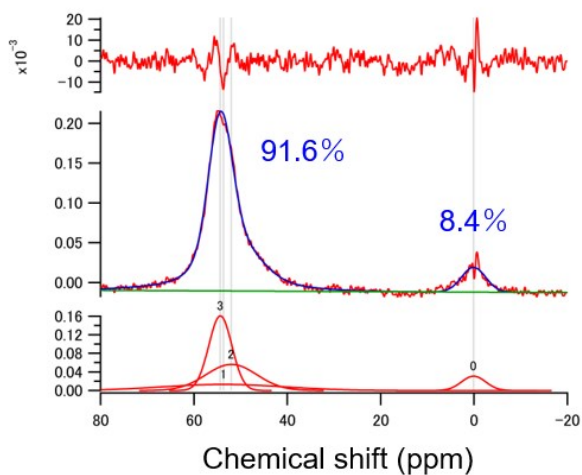

(c) Ag-ZSM-5-HT (Ag/Al=0.37)

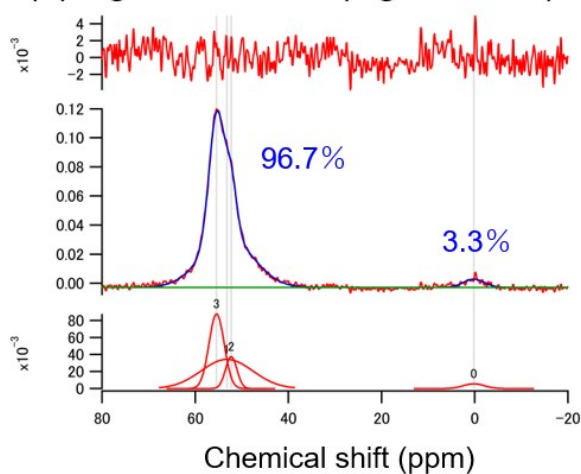

(d) Ag-ZSM-5-HT (Ag/Al=0.51)

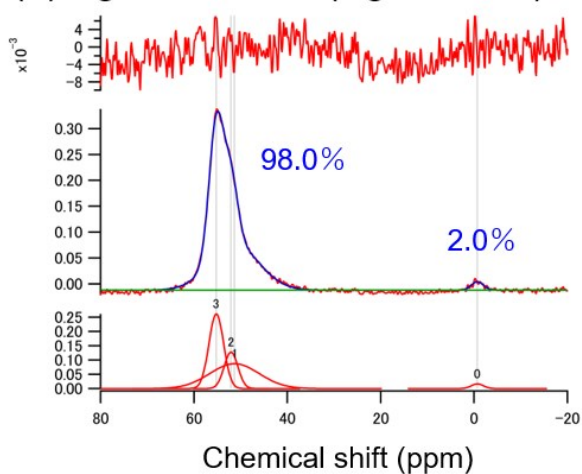

**Figure S21.** (middle)  $^{27}\text{Al}$  MAS NMR spectra of H-ZSM-5-HT and Ag-ZSM-5-HT with various Ag/Al ratio, together with Gaussian fitting results. (top) fitting error and (bottom) each fitted Gaussian peak. Asymmetric NMR peaks were fitted using two or more Gaussian peaks because  $^{27}\text{Al}$  have quadrupole moment and Al atoms in ZSM-5 were slightly different.

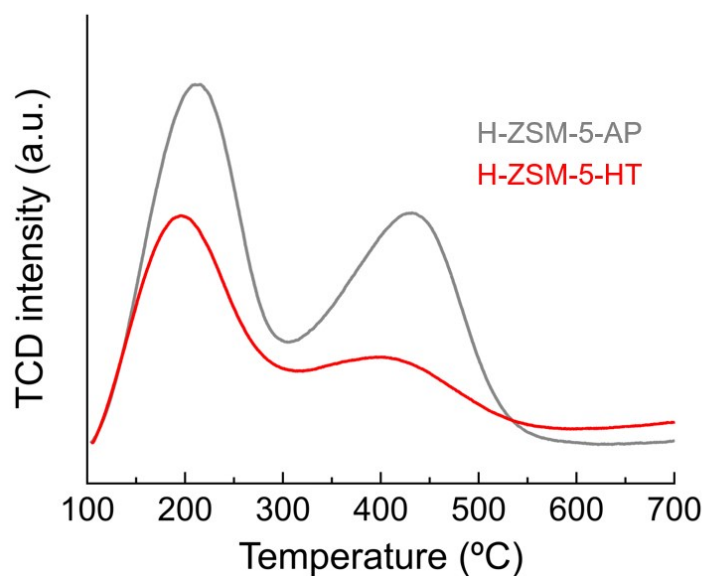

**Figure S22.** NH<sub>3</sub>-TPD profile of H-ZSM-5-AP and H-ZSM-5-HT.

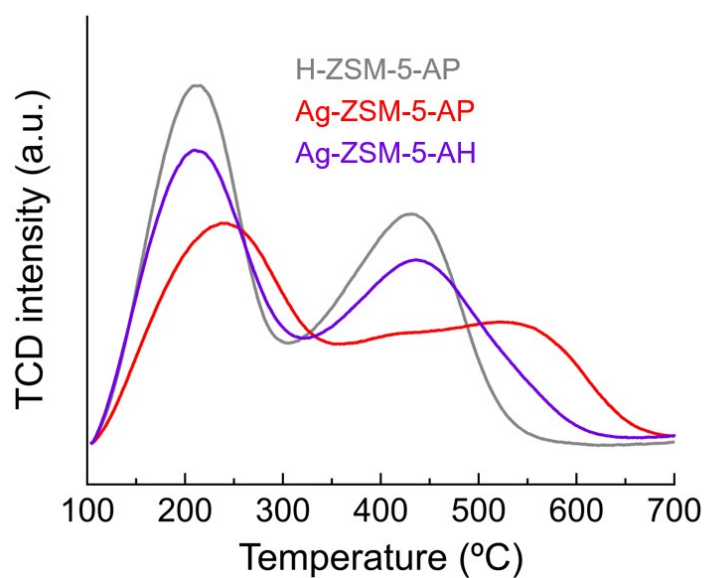

**Figure S23.** NH<sub>3</sub>-TPD profile of Ag-ZSM-5-AH, together with NH<sub>3</sub>-TPD profiles of H-ZSM-5-AP and Ag-ZSM-5-AP as references.

## References

- 1 T. Yumura, A. Oda, H. Torigoe, A. Itadani, Y. Kuroda, T. Wakasugi and H. Kobayashi, *J. Phys. Chem. C*, 2014, **118**, 23874–23887.
- 2 K. I. Shimizu, K. Sugino, K. Kato, S. Yokota, K. Okumura and A. Satsuma, *J. Phys. Chem. C*, 2007, **111**, 1683–1688.
- 3 W.-S. Ju, M. Matsuoka, K. Iino, H. Yamashita and M. Anpo, *J. Phys. Chem. B*, 2004, **108**, 2128–2133.
- 4 J. Shibata, K. I. Shimizu, Y. Takada, A. Shichi, H. Yoshida, S. Satokawa, A. Satsuma and T. Hattori, *J. Catal.*, 2004, **227**, 367–374.
- 5 F. Wang, J. Ma, G. He, M. Chen, C. Zhang and H. He, *ACS Catal.*, 2018, **8**, 2670–2682.
- 6 Z. Huang, J. Zhang, Y. Du, Y. Zhang, X. Wu and G. Jing, *ChemCatChem*, 2019, 561–568.
- 7 B. Gauri, K. Vidya, D. Sharada and W. Shobha, *Res. J. Chem. Environ.*, 2016, **20**, 1–5.
